# Supplementary material for: Dual Predation by Bacteriophage and Bdellovibrio bacteriovorus Can Eradicate Escherichia coli Prey in Situations where Single Predation Cannot
Source: PubMed Central journal article supplement (PMC7043672; doi:10.1128/jb.00629-19), 2020-02-25
Supplement: JB.00629-19-s0001.pdf [file JB.00629-19-s0001.pdf]

# 1 Dual Predation by Bacteriophage and *Bdellovibrio* Can Eradicate *E. coli* Prey in 2 Situations Where Single Predation Cannot

3 Laura Hobley,<sup>a\*</sup> J. Kimberley Summers,<sup>b</sup> Rob Till,<sup>a</sup> David S. Milner,<sup>a\*</sup> Robert J. Atterbury,<sup>a\*</sup>  
4 Amy Stroud,<sup>a</sup> Michael J. Capeness,<sup>a\*</sup> Stephanie Gray,<sup>a</sup> Andreas Leidenroth,<sup>a</sup> Carey  
5 Lambert,<sup>a</sup> Ian Connerton,<sup>c</sup> Jamie Twycross,<sup>d</sup> Michelle Baker,<sup>a\*</sup> Jess Tyson,<sup>a</sup> Jan-Ulrich  
6 Kreft,<sup>b#</sup> R. Elizabeth Sockett<sup>a#</sup>

7

## 8 Supplemental Text: Full description of the mathematical modelling process

9 **Introduction to the models.** We model a batch culture with all nutrients combined into  
10 a single abiotic resource (M for medium), a single prey species with up to four phenotypes  
11 ( $N_s$ ,  $N_R$ ,  $N_P$ ,  $N_D$ ; defined below), all of which display Monod growth kinetics, and two  
12 predators, *B. bacteriovorus* (P for predator) and bacteriophage (V for virus). The rate of  
13 predation by either predator is described either by a non-saturating (linear) or by a  
14 saturating functional response (Holling type II) (Fig. 4E). The *B. bacteriovorus* life cycle  
15 consists of two phases, an attack phase to search for and attach to prey and a bdelloplast  
16 phase during which the *B. bacteriovorus* cell is within the periplasm of a prey cell, modelled  
17 here as a distinct phase in the predation cycle (B for bdelloplast). *B. bacteriovorus* is known  
18 to have an unusually high mortality rate for bacteria so we include a mortality term  
19 (described below). The predation by the bacteriophage halo is also separated into two  
20 distinct phases, one represented again by either a non-saturating or a saturating functional  
21 response, and the second by the infected cell phase (I for infected) where the  
22 bacteriophage is replicating within the prey cell. Initial assumptions (that were later tested  
23 as described below) included that *B. bacteriovorus* predation followed saturating kinetics,  
24 whereas bacteriophage halo predation kinetics were non-saturating. During the bdelloplast  
25 (B) or infected prey (I) states, the host prey cell does not grow or replicate (and will not  
26 contribute to the viable prey count when comparing with experimental data) and the  
27 predator within the prey cell does not predate further until after lysis of the prey cell. In  
28 the experiments, there is regrowth of prey during halo phage predation that exceeds the  
29 growth in the absence of predators (Fig. 2A and B), therefore nutrients must have been  
30 released during predation as the amount of spent medium added with the prey cells into  
31 the Calcium HEPES buffer at the start of the experiments would not be sufficient for this  
32 amount of growth. This source of nutrients is assumed to derive from the lysis of the prey  
33 cells after predation by either the *B. bacteriovorus* or the bacteriophage. Fig. 4A shows  
34 the populations and interactions included in the final model and the corresponding  
35 equations are shown in Fig. 4B. The parameters, priors and fitted values are given in Table  
36 S1.

37 **Numerical integration of the model.** All model variants were implemented in MATLAB  
38 8.6.0.267246 (R2015b) and solved using the ordinary differential equation solver ode45,  
39 which implements an explicit Runge-Kutta method.

40 **Model fitting methodology.** We used a Sequential Monte Carlo (SMC) method (1) to  
41 select model variants and fit corresponding parameter sets using increasingly strict  
42 selection criteria (tolerance levels), see Fig. S3. As the priors were uniform, and the  
43 perturbation kernels were symmetric, all parameter sets carried equal weight. Each  
44 competition between model variants was performed for multiple generations. For each

45 generation, 1,000 'particles' (models with associated parameter sets) were selected and  
 46 models competed for up to 12 generations, while the thresholds for the acceptable distance  
 47 between observed and simulated data were reduced from generation to generation.

48 Each parameter set was evaluated for its fit to the experimental data using the distance  
 49 function:

$$50 \quad \text{average distance} = \frac{\sqrt{\text{sum}[(\text{point distance})^2]}}{\text{number of data points}}$$

51 where for each pair of data points (experimental and simulated) the point distance was  
 52 calculated as:

$$53 \quad \text{point distance} = (\log(\text{simulation datum}) - \log(\text{experimental datum}))$$

54 As the tolerance limit decreased from generation to generation, the distribution of  
 55 distances for accepted fits became increasingly narrow, indicating that the model  
 56 parameter set combinations were approaching the best fit possible for the model variants  
 57 and parameter ranges being tested (Fig. S3).

58 We repeated the model selection and fitting process ten times to test for the reproducibility  
 59 of its outcomes (Fig. S6).

60 **Top level model variants (Fig. 4C) – prey types.** In our hierarchical model selection  
 61 process, the top level model variants differ in the number of prey types. All mid-level  
 62 variants deal with different ways of converting between prey types and therefore depend  
 63 on the number of prey types, which is why the process is hierarchical. We identified the  
 64 number of prey types (1-3) required to explain the experimental results. N1 is the base  
 65 model with 1 prey phenotype, the prey type sensitive to both predators ( $N_S$ ), and its  
 66 equations are:

$$67 \quad \frac{dM}{dt} = -N_S \frac{\mu_N M}{(K_{M,N} + M)Y_{N/M}} + Y_{M/P} k_p B + Y_{M/V} k_v I \quad (\text{N1a})$$

$$68 \quad \frac{dN_S}{dt} = N_S \frac{\mu_N M}{K_{M,N} + M} - P \frac{\mu_P N_S}{(K_{N,P} + N_S)Y_{B/N}} - V \frac{\mu_V N_S}{Y_{I/V}} \quad (\text{N1b})$$

$$69 \quad \frac{dP}{dt} = k_p B - m P - P \frac{\mu_P N_S}{(K_{N,P} + N_S)Y_{B/P}} \quad (\text{N1c})$$

$$70 \quad \frac{dB}{dt} = P \frac{\mu_P N_S}{K_{N,P} + N_S} - \frac{k_p B}{Y_{P/B}} \quad (\text{N1d})$$

$$71 \quad \frac{dV}{dt} = k_v I - V \frac{\mu_V N_S}{Y_{I/V}} \quad (\text{N1e})$$

$$72 \quad \frac{dI}{dt} = V \mu_V N_S - \frac{k_v I}{Y_{V/I}} \quad (\text{N1f})$$

73 Model N2 includes two prey phenotypes, the prey type sensitive to both predators ( $N_S$ ) as  
 74 in model N1 and one resistant to bacteriophage predation (but still sensitive to *B.*  
 75 *bacteriovorus* predation;  $N_R$ ). In this model variant, it is assumed that the bacteriophage  
 76 resistant subpopulation was a small fraction present at the beginning of the experiment  
 77 (given by the parameter  $F_R$ ) and that phage resistance can arise in sensitive cells (at a  
 78 rate of *de novo* mutations that is fitted). It is also assumed that *B. bacteriovorus* predation  
 79 does not distinguish between these prey types, and that there is no effect on growth  
 80 kinetics due to bacteriophage resistance (cf. our experimental results showing that phage  
 81 resistance is due to a mutation in the ferric hydroxamate uptake gene *fhuA* that had no  
 82 growth defect in the iron sufficient conditions of the experiment).

83 The equations for model N2 are:

$$84 \quad \frac{dM}{dt} = -(N_S + N_R) \frac{\mu_N M}{(K_{M,N} + M) Y_{N/M}} + Y_{M/P} k_p B + Y_{M/V} k_v I \quad (N2a)$$

$$85 \quad \frac{dN_S}{dt} = N_S \frac{\mu_N M}{K_{M,N} + M} - P \frac{\mu_P N_S}{(K_{N,P} + N_S + N_R) Y_{B/N}} - V \frac{\mu_V N_S}{Y_{I/N}} - k_M N_S \quad (N2b)$$

$$86 \quad \frac{dN_R}{dt} = N_R \frac{\mu_N M}{K_{M,N} + M} - P \frac{\mu_P N_R}{(K_{N,P} + N_S + N_R) Y_{B/N}} + k_M N_S, N_R(t=0) = F_R N_S(t=0) \quad (N2c)$$

$$87 \quad \frac{dP}{dt} = k_p B - m P - P \frac{\mu_P (N_S + N_R)}{(K_{N,P} + N_S + N_R) Y_{B/P}} \quad (N2d)$$

$$88 \quad \frac{dB}{dt} = P \frac{\mu_P (N_S + N_R)}{K_{N,P} + N_S + N_R} - \frac{k_p B}{Y_{P/B}} \quad (N2e)$$

$$89 \quad \frac{dV}{dt} = k_v I - V \frac{\mu_V N_S}{Y_{I/V}} \quad (N2f)$$

$$90 \quad \frac{dI}{dt} = V \mu_V N_S - \frac{k_v I}{Y_{V/I}} \quad (N2g)$$

91 The third variant, N3, is model N2 with a third prey population that exhibits 'plastic'  
 92 phenotypic resistance to *B. bacteriovorus* predation ( $N_P$ ). Subsequent model levels  
 93 consider the mechanisms by which this plastic resistance arises and by which conversion  
 94 back to sensitive prey may occur. At this level, plastic resistance is modelled to arise  
 95 intrinsically (spontaneously) at a fixed rate whilst reversion to sensitive is coupled to  
 96 growth of the plastic resistant type. The equations for model variant N3 with these specifics  
 97 are shown further below (equation set N3-IG).

98 The final variant, N4, is variant N3 with a fourth prey population with double resistance  
 99 ( $N_D$ ), i.e., heritable phage resistance and plastic phenotypic resistance to *B. bacteriovorus*.

100 Model variants with only sensitive prey (N1) or sensitive and phage resistant prey (N2)  
 101 were not at all supported by the data. Model variant N3 was best supported and model  
 102 variant N4 was selected with a frequency of  $\sim 1/3$  (Fig. 5A), strongly supporting the  
 103 existence of the three prey phenotypes: sensitive, phage resistant, and plastic resistant  
 104 to *B. bacteriovorus*. The double resistant prey can exist as the two resistance mechanisms  
 105 are independent, but predicted abundances are very low so in a natural environment with  
 106 additional causes of mortality, they will be unlikely to survive.

107 **Mid-level model variants (Fig. 4Di) – generating plastic resistance of prey to *B.***  
 108 ***bacteriovorus* predation.** We then inferred by which mechanism plastic prey resistance  
 109 to *B. bacteriovorus* predation arises, and how these plastic resistant prey revert to  
 110 sensitive prey.

111 One variant assumes that conversion is intrinsic (spontaneous, without external trigger)  
 112 in both directions, from sensitive to resistant and back. This is model N3-I (I for intrinsic  
 113 conversion). Conversion occurs with a certain specific rate ( $k_D$ ) and is proportional to prey  
 114 cell density; likewise for reversion to sensitive ( $k_R$ ). The growth rates of sensitive and  
 115 plastic resistant prey are allowed to differ by the factor  $\eta_P$ , which is fitted and can be  
 116 greater or less than 1 (Table S1).

117 The equations for variant N3-I are:

$$118 \quad \frac{dM}{dt} = -(N_S + N_R + N_P \eta_P) \frac{\mu_N M}{(K_{M,N} + M) Y_{N/M}} + Y_{M/P} k_p B + Y_{M/V} k_v I \quad (\text{N3-Ia})$$

$$119 \quad \frac{dN_S}{dt} = N_S \frac{\mu_N M}{K_{M,N} + M} - P \frac{\mu_P N_S}{(K_{N,P} + N_S + N_P + N_R) Y_{B/N}} - V \frac{\mu_V N_S}{Y_{I/N}} - \mathbf{k}_D N_S + \mathbf{k}_R N_P - k_M N_S \quad (\text{N3-Ib})$$

$$120 \quad \frac{dN_P}{dt} = N_P \frac{\eta_P \mu_N M}{K_{M,N} + M} - V \frac{\mu_V N_P}{Y_{I/N}} + \mathbf{k}_D N_S - \mathbf{k}_R N_P \quad (\text{N3-Ic})$$

$$121 \quad \frac{dN_R}{dt} = N_R \frac{\mu_N M}{K_{M,N} + M} - P \frac{\mu_P N_R}{(K_{N,P} + N_S + N_P + N_R) Y_{B/N}} + k_M N_S, N_R(t=0) = F_R N_S(t=0) \quad (\text{N3-Id})$$

$$122 \quad \frac{dP}{dt} = k_p B - m P - P \frac{\mu_P (N_S + N_R)}{(K_{N,P} + N_S + N_P + N_R) Y_{B/P}} \quad (\text{N3-Ie})$$

$$123 \quad \frac{dB}{dt} = P \frac{\mu_P (N_S + N_R)}{K_{N,P} + N_S + N_P + N_R} - \frac{k_p B}{Y_{P/B}} \quad (\text{N3-If})$$

$$124 \quad \frac{dV}{dt} = k_V I - V \frac{\mu_V (N_S + N_P)}{Y_{I/V}} \quad (\text{N3-Ig})$$

$$125 \quad \frac{dI}{dt} = V \mu_V (N_S + N_P) - \frac{k_V I}{Y_{V/I}} \quad (\text{N3-Ih})$$

126 Another variant also assumes that the plastic resistance occurs spontaneously, but differs  
 127 in that these plastic resistant prey revert to sensitive in a growth-coupled manner, model  
 128 N3-IG (IG for intrinsic conversion with growth-coupled back conversion). This is the sub-  
 129 model of N3 used for the top-level model selection and given by these equations:

$$130 \quad \frac{dM}{dt} = -(N_S + N_R + N_P) \frac{\mu_N M}{(K_{M,N} + M) Y_{N/M}} + Y_{M/P} k_p B + Y_{M/V} k_v I \quad (\text{N3-IGa})$$

$$131 \quad \frac{dN_S}{dt} = (N_S + N_P) \frac{\mu_N M}{K_{M,N} + M} - P \frac{\mu_P N_S}{(K_{N,P} + N_S + N_P + N_R) Y_{B/N}} - V \frac{\mu_V N_S}{Y_{I/N}} - \mathbf{k}_D N_S - k_M N_S \quad (\text{N3-IGb})$$

$$132 \quad \frac{dN_P}{dt} = -V \frac{\mu_V N_P}{Y_{I/N}} + \mathbf{k}_D N_S \quad (\text{N3-IGc})$$

$$133 \quad \frac{dN_R}{dt} = N_R \frac{\mu_N M}{K_{M,N} + M} - P \frac{\mu_P N_R}{(K_{N,P} + N_S + N_P + N_R) Y_{B/N}} + k_M N_S, N_R(t=0) = F_R N_S(t=0) \quad (\text{N3-IGd})$$

$$134 \quad \frac{dP}{dt} = k_p B - m P - P \frac{\mu_P (N_S + N_R)}{(K_{N,P} + N_S + N_P + N_R) Y_{B/P}} \quad (\text{N3-IGe})$$

$$135 \quad \frac{dB}{dt} = P \frac{\mu_P (N_S + N_R)}{K_{N,P} + N_S + N_P + N_R} - \frac{k_p B}{Y_{P/B}} \quad (\text{N3-IGf})$$

$$136 \quad \frac{dV}{dt} = k_V I - V \frac{\mu_V (N_S + N_P)}{Y_{I/V}} \quad (\text{N3-IGg})$$

$$137 \quad \frac{dI}{dt} = V \mu_V (N_S + N_P) - \frac{k_V I}{Y_{V/I}} \quad (\text{N3-IGh})$$

138 A third variant assumes that plastic resistance arises due to the production of some lumped  
 139 signal S, resulting from predation. Such signals could be released during the lysis of prey,  
 140 so this model includes terms for a signal being released from both the lysis of bdelloplasts  
 141 and the lysis of phage-infected prey. N3-S models back conversion of plastic resistant prey  
 142 to sensitive as being intrinsic, as in variant N3-I above. The equations for model variant  
 143 N3-S are:

$$144 \quad \frac{dM}{dt} = -(N_S + N_R + N_P \eta_P) \frac{\mu_N M}{(K_{M,N} + M) Y_{N/M}} + Y_{M/P} k_P B + Y_{M/V} k_V I \quad (\text{N3-Sa})$$

$$145 \quad \frac{dN_S}{dt} = N_S \frac{\mu_N M}{K_{M,N} + M} - P \frac{\mu_P N_S}{(K_{N,P} + N_S + N_P + N_R) Y_{B/N}} - V \frac{\mu_V N_S}{Y_{I/V}} - k_D S N_S + k_R N_P - k_M N_S \quad (\text{N3-Sb})$$

$$146 \quad \frac{dN_P}{dt} = N_P \frac{\eta_P \mu_N M}{K_{M,N} + M} - V \frac{\mu_V N_P}{Y_{I/V}} + k_D S N_S - k_R N_P \quad (\text{N3-Sc})$$

$$147 \quad \frac{dN_R}{dt} = N_R \frac{\mu_N M}{K_{M,N} + M} - P \frac{\mu_P N_R}{(K_{N,P} + N_S + N_P + N_R) Y_{B/N}} + k_M N_S, N_R(t=0) = F_R N_S(t=0) \quad (\text{N3-Sd})$$

$$148 \quad \frac{dP}{dt} = k_P B - m P - P \frac{\mu_P (N_S + N_R)}{(K_{N,P} + N_S + N_P + N_R) Y_{B/P}} \quad (\text{N3-Se})$$

$$149 \quad \frac{dB}{dt} = P \frac{\mu_P (N_S + N_R)}{K_{N,P} + N_S + N_P + N_R} - \frac{k_P B}{Y_{P/B}} \quad (\text{N3-Sf})$$

$$150 \quad \frac{dV}{dt} = k_V I - V \frac{\mu_V (N_S + N_P)}{Y_{I/V}} \quad (\text{N3-Sg})$$

$$151 \quad \frac{dI}{dt} = V \mu_V (N_S + N_P) - \frac{k_V I}{Y_{V/I}} \quad (\text{N3-Sh})$$

$$152 \quad \frac{dS}{dt} = \frac{k_P B}{Y_{P/B}} + \frac{k_V I}{Y_{V/I}} \quad (\text{N3-Si})$$

153 Competing these three variants (Fig. 5B and S6) revealed that the data gave very little  
 154 support for model N3-I, some support (between 9.4% and 27% of accepted parameter  
 155 sets) for variant N3-S, and stronger support for variant N3-IG (between 62% to 89% of  
 156 accepted parameter sets).

157 We then decided to try a combination of the two variants that were supported by the data,  
 158 where the plastic resistant prey arise in response to a predation signal and the back  
 159 conversion to sensitive is coupled to growth, giving model N3-SG:

$$160 \quad \frac{dM}{dt} = -(N_S + N_R + N_P) \frac{\mu_N M}{(K_{M,N} + M) Y_{N/M}} + Y_{M/P} k_p B + Y_{M/V} k_v I \quad (\text{N3-SGa})$$

$$161 \quad \frac{dN_S}{dt} = (N_S + N_P) \frac{\mu_N M}{K_{M,N} + M} - P \frac{\mu_P N_S}{(K_{N,P} + N_S + N_P + N_R) Y_{B/N}} - V \frac{\mu_V N_S}{Y_{I/N}} - k_D S N_S - k_M N_S \quad (\text{N3-SGb})$$

$$162 \quad \frac{dN_P}{dt} = -V \frac{\mu_V N_P}{Y_{I/N}} + k_D S N_S \quad (\text{N3-SGc})$$

$$163 \quad \frac{dN_R}{dt} = N_R \frac{\mu_N M}{K_{M,N} + M} - P \frac{\mu_P N_R}{(K_{N,P} + N_S + N_P + N_R) Y_{B/N}} + k_M N_S, N_R(t=0) = F_R N_S(t=0) \quad (\text{N3-SGd})$$

$$164 \quad \frac{dP}{dt} = k_p B - m P - P \frac{\mu_P (N_S + N_R)}{(K_{N,P} + N_S + N_P + N_R) Y_{B/P}} \quad (\text{N3-SGe})$$

$$165 \quad \frac{dB}{dt} = P \frac{\mu_P (N_S + N_R)}{K_{N,P} + N_S + N_P + N_R} - \frac{k_P B}{Y_{P/B}} \quad (\text{N3-SGf})$$

$$166 \quad \frac{dV}{dt} = k_v I - V \frac{\mu_V (N_S + N_P)}{Y_{I/V}} \quad (\text{N3-SGg})$$

$$167 \quad \frac{dI}{dt} = V \mu_V (N_S + N_P) - \frac{k_V I}{Y_{V/I}} \quad (\text{N3-SGh})$$

$$168 \quad \frac{dS}{dt} = \frac{k_P B}{Y_{P/B}} + \frac{k_V I}{Y_{V/I}} \quad (\text{N3-SGi})$$

169 Competing variants N3-S, N3-IG and N3-SG showed that the data supported the  
 170 (re)combined variant N3-SG much better than its parents N3-S and N3-IG (Fig. 5C and  
 171 S6). Thus, we can infer from the modelling that plastic resistance arises as a result of  
 172 some signal(s) released upon lysis of infected prey, and that the growth of plastic resistant  
 173 prey results in the production of sensitive prey.

174 **Mid level model variants (Fig. 4Di) – source of the signal resulting in plastic**  
 175 **resistance.** We next inferred potential sources for the production of the signal triggering  
 176 conversion to plastic resistance. Model N3-SG assumes that the signal is generated by  
 177 lysis of both *B. bacteriovorus* infected prey (bdelloplasts) and bacteriophage infected prey.  
 178 However, the signal may be specifically released by lysis of B or I. Variant N3-SVG  
 179 assumes signal production from lysis of the virus (bacteriophage) infected prey I. This is  
 180 the same as variant N3-SG except that equation N3-SGi is replaced by equation N3-SVGi:

$$181 \quad \frac{dS}{dt} = \frac{k_V I}{Y_{V/I}} \quad (\text{N3-SVGi})$$

182 The alternative variant is that the signal was specifically released by lysis of B, the  
 183 bdelloplasts, giving model N3-SBG. Here, the equations are again the same as variant N3-  
 184 SG except that equation N3-SGi replaced by N3-SBGi:

$$185 \quad \frac{dS}{dt} = \frac{k_P B}{Y_{P/B}} \quad (\text{N3-SBGi})$$

186 Competing these three variants (Fig. 5D and S6) showed no support for a model where  
 187 the signal is generated by lysis of the bacteriophage-infected prey only. The support for  
 188 the other two variants was almost equal. Since there was no evidence for phage  
 189 involvement in signal generation, the model N3-SBG where all signal is derived from *B.*  
 190 *bacteriovorus* predation is the logical choice.

191 **Mid level model variants (Fig. 4Dii) – generating phage resistant prey.** The  
 192 successful model variant N3 (or more precisely N3-IG) was then used as a basis to infer  
 193 how phage resistance could arise. One variant assumed that all prey were sensitive to  
 194 phage at the outset of the experiment but that the resistant population  $N_R$  could develop  
 195 by *de novo* mutations during the experiment with mutation rate  $k_M$  (Table S1), giving  
 196 model N3-RD (from resistance developing):

$$197 \quad \frac{dM}{dt} = -(N_S + N_R + N_P) \frac{\mu_N M}{(K_{M,N} + M)Y_{N/M}} + Y_{M/P} k_p B + Y_{M/V} k_v I \quad (\text{N3-RDa})$$

$$198 \quad \frac{dN_S}{dt} = (N_S + N_P) \frac{\mu_N M}{K_{M,N} + M} - P \frac{\mu_P N_S}{(K_{N,P} + N_S + N_P + N_R)Y_{B/N}} - V \frac{\mu_V N_S}{Y_{I/N}} - k_D N_S - k_M N_S \quad (\text{N3-RDb})$$

$$199 \quad \frac{dN_P}{dt} = -V \frac{\mu_V N_P}{Y_{I/N}} + k_D N_S \quad (\text{N3-RDc})$$

$$200 \quad \frac{dN_R}{dt} = N_R \frac{\mu_N M}{K_{M,N} + M} - P \frac{\mu_P N_R}{(K_{N,P} + N_S + N_P + N_R)Y_{B/N}} + k_M N_S, N_R(t = 0) = 0 \quad (\text{N3-RDd})$$

$$201 \quad \frac{dP}{dt} = k_p B - m P - P \frac{\mu_P (N_S + N_R)}{(K_{N,P} + N_S + N_P + N_R)Y_{B/P}} \quad (\text{N3-RDe})$$

$$202 \quad \frac{dB}{dt} = P \frac{\mu_P (N_S + N_R)}{K_{N,P} + N_S + N_P + N_R} - \frac{k_p B}{Y_{P/B}} \quad (\text{N3-RDf})$$

$$203 \quad \frac{dV}{dt} = k_v I - V \frac{\mu_V (N_S + N_P)}{Y_{I/V}} \quad (\text{N3-RDg})$$

$$204 \quad \frac{dI}{dt} = V \mu_V (N_S + N_P) - \frac{k_V I}{Y_{V/I}} \quad (\text{N3-RDh})$$

205 Another variant assumed that a fraction  $F_R$  (Table S1) of the prey population was already  
 206 resistant initially, but that further resistance via mutation did not develop (model N3-RI):

$$207 \quad \frac{dM}{dt} = -(N_S + N_R + N_P) \frac{\mu_N M}{(K_{M,N} + M)Y_{N/M}} + Y_{M/P} k_p B + Y_{M/V} k_v I \quad (\text{N3-RIa})$$

$$208 \quad \frac{dN_S}{dt} = (N_S + N_P) \frac{\mu_N M}{K_{M,N} + M} - P \frac{\mu_P N_S}{(K_{N,P} + N_S + N_P + N_R)Y_{B/N}} - V \frac{\mu_V N_S}{Y_{I/N}} - k_D N_S \quad (\text{N3-RIb})$$

$$209 \quad \frac{dN_P}{dt} = -V \frac{\mu_V N_P}{Y_{I/N}} + k_D N_S \quad (\text{N3-RIc})$$

$$210 \quad \frac{dN_R}{dt} = N_R \frac{\mu_N M}{K_{M,N} + M} - P \frac{\mu_P N_R}{(K_{N,P} + N_S + N_P + N_R)Y_{B/N}}, N_R(t = 0) = F_R N_S(t = 0) \quad (\text{N3-RI d})$$

$$211 \quad \frac{dP}{dt} = k_p B - m P - P \frac{\mu_P (N_S + N_R)}{(K_{N,P} + N_S + N_P + N_R)Y_{B/P}} \quad (\text{N3-RIe})$$

$$212 \quad \frac{dB}{dt} = P \frac{\mu_P (N_S + N_R)}{K_{N,P} + N_S + N_P + N_R} - \frac{k_p B}{Y_{P/B}} \quad (\text{N3-RI f})$$

$$213 \quad \frac{dV}{dt} = k_v I - V \frac{\mu_V (N_S + N_P)}{Y_{I/V}} \quad (\text{N3-RIg})$$

$$214 \quad \frac{dI}{dt} = V \mu_V (N_S + N_P) - \frac{k_V I}{Y_{V/I}} \quad (\text{N3-RIh})$$

215 The combined variant N3-RID where phage resistance is both present as an initial  
 216 subpopulation of the prey and also arises due to *de novo* mutations during the course of  
 217 the experiment was better supported by the data than N3-RI; N3-RD was not supported  
 218 at all (Fig. 5E). Model N3-RID is identical to the original model variant N3 described above.

219 **Low level model variants – saturating or non-saturating predation kinetics (Fig.**  
220 **4E).** The model was initially constructed assuming that bacteriophage predation would not  
221 saturate with increasing prey density but that *B. bacteriovorus* predation would saturate  
222 (Holling type II kinetics) due to its longer handling time (time for attachment and prey  
223 entry). This assumption was challenged by testing all four combinations of saturating and  
224 non-saturating functional responses for the two predators (Fig. 5F). The previously used  
225 model variant N3-SBG (see above) was in fact N3-SBG-Pii-Vi where Pii means Predator  
226 follows saturating kinetics and Vi means that the Virus follows non-saturating or type I  
227 kinetics. This original model was competed against variants N3-SBG-Pi-Vi (both predators  
228 following non-saturating kinetics), N3-SBG-Pi-Vii (*B. bacteriovorus* following non-  
229 saturating and phage saturating kinetics) and N3-SBG-Vii-Pii (both predators following  
230 saturating kinetics). The previously used variant N3-SBG-Pii-Vi consistently outcompeted  
231 all other variants (Fig. 5F).

232 **Low level model variants – fixed or fitted *B. bacteriovorus* mortality.** There  
233 remained some discrepancy in the best fitting model with regards to the decline in *B.*  
234 *bacteriovorus* numbers seen in the experimental data. Therefore, we allowed *B.*  
235 *bacteriovorus* mortality, which had previously been fixed at  $0.06 \text{ h}^{-1}$ , a value taken from  
236 (2), to be fitted as an additional parameter. The N3-SBG-Pii-Vi model with fitted *B.*  
237 *bacteriovorus* mortality clearly outcompeted the variant with fixed mortality (Fig. 5G).

238 **The final model.** The variant with fitted mortality became the final model, N3-SBG-RID-  
239 Pii-Vi-fitted-mortality or N3-SBG for short, which was used in the simulations of the  
240 experimental data shown in Fig. 6. Fitted parameters are given in Table S1. The equations  
241 are shown in Fig. 4B and are the same as N3-SBG above.

242 **Picking typical parameters with PCA (Fig. S7).** In order to objectively pick a typical  
243 parameter set to be used in model simulations shown in Fig. 6 from the many accepted  
244 fits, we used Principal Component Analysis (PCA) to find the parameter set in the centre  
245 of the cloud of points, which we regard as 'typical' or 'average'. We applied this PCA idea  
246 to the parameter sets obtained by fitting the final model to all the experimental data  
247 (fitting 15 parameters, one (*B. bacteriovorus* burst size) was fixed). One of these  
248 parameter sets was chosen (Fig. S7). The values are given in Table S1 and the fit to the  
249 experimental data is shown in Fig. 6A-D. We did the same for the parameter sets fitted to  
250 all data without dual predation, the resulting typical parameter set is also given in Table  
251 S1 and the fit to experimental data is shown in Fig. 6E-H. The two fits, to all data or to all  
252 data without dual predation, are very similar, suggesting that the combined action of the  
253 two predators does not require any additional terms for direct interactions between the  
254 two, and that the observed kinetics of dual predation can be predicted from the actions of  
255 each predator alone.

#### 256 **CODE for Modelling:**

257 link at <https://github.com/kreft/predatorprey>

258  
259

#### 260 **References**

261

- 262 1. Toni T, Welch D, Strelkova N, Ipsen A, Stumpf MP. 2009. Approximate Bayesian  
263 computation scheme for parameter inference and model selection in dynamical  
264 systems. *J R Soc Interface* 6:187-202.
- 265 2. Hespell RB, Rosson RA, Thomashow MF, Rittenberg SC. 1973. Respiration of  
266 *Bdellovibrio bacteriovorus* strain 109J and its energy substrates for  
267 intraperiplasmic growth. *J Bacteriol* 113:1280-8.



268 **Supplemental Legends**

269

270 **Table S1. Description of model parameters with their symbols and units.** The  
271 ranges used for parameter fitting (priors) and results of ABC-SMC fitting are also given.  
272 Typical fitted parameters were identified using PCA, see Supplemental text and Fig. S7 for  
273 an explanation.

274 **Fig. S1. Isolation and peptide analysis of a bacteriophage halo protein from the**  
275 **0.22µm filtrate. (A)** SDS-page analysis of the purified bacteriophage halo showing  
276 multiple protein bands. The highlighted ~30 kDa band was extracted and analysed by  
277 MALDI QToF MS, showing homology to protein RTP27 of the rosette-tailed bacteriophage  
278 RTP. **(B)** Five peptides (bold) found by MALDI QToF MS analysis of the 30 kDa protein  
279 from panel (A) with homology to the 34 kDa protein RTP27 (GenBank accession no:  
280 CAJ42231.1, EMBL Accession Number AM156909.1) of a rosette-tailed phage (RTP) of *E.*  
281 *coli* (32).

282 **Fig. S2. Plaque morphology from *E. coli* lawns on agar overlay plates** of **(A)**  
283 purified *B. bacteriovorus* angelus alone after 6 days incubation and **(B)** when co-cultured  
284 with bacteriophage halo after 1 day of incubation, showing differences in plaque  
285 dimensions (bracketed on plate images taken at identical magnification), morphology  
286 and speed of plaque formation.

287 **Fig. S3. The fit of the final model improves from generation to generation in the**  
288 **ABC-SMC method** Each generation lowered the threshold for accepting a fit. In the final  
289 generation, all accepted fits have a similar distance between simulated and experimental  
290 data, showing that fits with further reduced distance did not occur. None of the accepted  
291 fits in the first generation would have been accepted in the last generation. The x axis  
292 has no meaning and is simply used to spread out the data. See Supplemental Text for  
293 the distance measure.

294 **Fig. S4. Improved model fit.** The fit of the final model to all data improves over the  
295 generations, showing a subset of the generations in Fig. S3.

296 **Fig. S5. Convergence of fitted parameters from generation to generation,** We  
297 started from the uniform priors to the values after the final generation 12. Parameters  
298 that are better informed by the experimental data reach a more narrow spread of fitted  
299 values. Medians and quartiles from the final generation are shown in Supplemental Table  
300 S1. Note the log scale for the parameters.

301 **Fig. S6. Box plots showing the variation amongst the 10 repeats of model**  
302 **selection.** We repeated the model selection procedure shown in Fig. 4B-D ten times  
303 because finding 1,000 acceptable parameter sets with a Monte Carlo method could lead  
304 to some variation between runs of the ABC-SMC algorithm and it is good to check  
305 whether these difference are large. Box plots show the variation amongst the 10  
306 repeats. We only show repeats for sub-model selections where the outcome was not  
307 100% in favour of one model variant. The Bayes factor is the ratio of the times model X  
308 was accepted versus model Y.

309 **Fig. S7. Objective selection of a typical parameter set.** Selection was from the  
310 hundreds of parameter sets that gave acceptable fits and were nearly equally good (see  
311 Fig. S3). Principal Component Analysis (PCA) was used to find the centre of the cloud of  
312 parameter sets in 15 dimensional parameter space. Four parameter sets that were  
313 closest to the centre were picked and used to run simulations. Results of these 4

314 simulations were indistinguishable by eye and one of these 4 parameter sets was then  
315 chosen as 'typical' and used in Fig. 5 and reported in Table S1.

316 **Fig. S8. Effect of varying initial densities.** The model was simulated using the typical  
317 parameter values fitted to all data in Table S1, with either initial values from the  
318 experimental data (solid lines), one order of magnitude higher than these values (dashed  
319 lines) or one order of magnitude lower (dotted lines). Blue: *E. coli* prey, Red: *B.*  
320 *bacteriovorus*, Green: bacteriophage halo, Pink: medium. **(A)** Effects of initial prey density  
321 on prey only scenario. **(B-C)** Effects of varying either initial prey **(B)** or initial *Bdellovibrio*  
322 **(C)** densities on *Bdellovibrio* only predation. **(D-E)** Effects of varying either initial prey  
323 **(D)** or initial halophage **(E)** densities on halophage only predation. **(F-H)** Effects of  
324 varying either initial prey **(F)**, initial *Bdellovibrio* **(G)** or initial halophage **(H)** densities on  
325 dual predation.

326

327  
328  
329  
330

**Table S1. Description of model parameters with their symbols and units.** The ranges used for parameter fitting (priors) and results of ABC-SMC fitting are also given. Typical fitted parameters were identified using PCA, see Supplementary text S1 and Fig. S7 for an explanation.

| Parameters                                                                | Units                                                                                                    | Priors for fitting    |                      | Statistics of fitted parameters |                                                | Typical fitted parameters     |                                  |
|---------------------------------------------------------------------------|----------------------------------------------------------------------------------------------------------|-----------------------|----------------------|---------------------------------|------------------------------------------------|-------------------------------|----------------------------------|
|                                                                           |                                                                                                          | Minimum value         | Maximum value        | Median                          | 25 <sup>th</sup> – 75 <sup>th</sup> percentile | Using all data for fitting    | Without using dual predator data |
| Initial phage resistant fraction of prey ( $F_R$ )                        | dimensionless                                                                                            | $1.0 \times 10^{-6}$  | $1.0 \times 10^{-4}$ | $3.6 \times 10^{-6}$            | $2.3 \times 10^{-6}$<br>$5.4 \times 10^{-6}$   | $8.6 \times 10^{-6}$          | $3.9 \times 10^{-6}$             |
| Prey maximum growth rate ( $\mu_N$ )                                      | $h^{-1}$                                                                                                 | $\frac{1}{4} \ln(2)$  | $3 \ln(2)$           | 0.47                            | 0.38<br>0.60                                   | 0.46                          | 1.3                              |
| Prey affinity for medium ( $K_{M,N}$ )                                    | $pg\ ml^{-1}$                                                                                            | $1.0 \times 10^7$     | $4.0 \times 10^{10}$ | $3.8 \times 10^7$               | $1.9 \times 10^7$<br>$6.7 \times 10^7$         | $4.2 \times 10^7$             | $1.6 \times 10^8$                |
| Growth rate scaling for plastic resistant prey ( $\eta_P$ )               | dimensionless                                                                                            | 0.4                   | 2                    | 0.98                            | 0.72<br>1.3                                    | Parameter not in final model  |                                  |
| Yield of prey per medium ( $Y_{N/M}$ )                                    | prey cells<br>$pg\ substrate^{-1}$                                                                       | 1                     | 10                   | 2.2                             | 1.5<br>3.0                                     | 1.2                           | 1.8                              |
| <i>B. bacteriovorus</i> maximum attack rate – non-saturating ( $\mu_P$ )  | bdelloplast cells<br><i>B. bacteriovorus</i> cells <sup>-1</sup><br>prey cells <sup>-1</sup><br>$h^{-1}$ | $2.1 \times 10^{-9}$  | $5.1 \times 10^{-7}$ | $2.3 \times 10^{-8}$            | $1.6 \times 10^{-8}$<br>$3.0 \times 10^{-8}$   | Parameter not in final model  |                                  |
| <i>B. bacteriovorus</i> maximum attack rate – Holling type II ( $\mu_P$ ) | bdelloplast cells<br><i>B. bacteriovorus</i> cells <sup>-1</sup><br>$h^{-1}$                             | $8.1 \times 10^{-2}$  | $2.1 \times 10^1$    | 0.36                            | 0.31<br>0.43                                   | 0.33                          | 0.36                             |
| <i>B. bacteriovorus</i> affinity for prey ( $K_{N,P}$ )                   | prey cells $ml^{-1}$                                                                                     | $2.0 \times 10^4$     | $1.0 \times 10^9$    | $3.2 \times 10^6$               | $2.5 \times 10^6$<br>$4.2 \times 10^6$         | $3.2 \times 10^6$             | $3.6 \times 10^6$                |
| Bdelloplast maturation rate ( $k_P$ )                                     | <i>B. bacteriovorus</i> cells<br>bdelloplast cells <sup>-1</sup><br>$h^{-1}$                             | $7.0 \times 10^{-1}$  | $2.5 \times 10^0$    | 0.86                            | 0.78<br>0.98                                   | 1.1                           | 1.1                              |
| Bacteriophage halo maximum attack rate – non-saturating ( $\mu_V$ )       | infected cells<br>bacteriophage virions <sup>-1</sup><br>prey cells <sup>-1</sup><br>$h^{-1}$            | $1.0 \times 10^{-10}$ | $1.0 \times 10^{-7}$ | $1.6 \times 10^{-9}$            | $1.2 \times 10^{-9}$<br>$2.2 \times 10^{-9}$   | $3.9 \times 10^{-9}$          | $1.9 \times 10^{-9}$             |
| Bacteriophage halo maximum attack rate – Holling type II ( $\mu_V$ )      | infected cells<br>bacteriophage virions <sup>-1</sup><br>$h^{-1}$                                        | $3.2 \times 10^{-3}$  | $3.2 \times 10^0$    | 0.43                            | 0.22<br>0.91                                   | Parameters not in final model |                                  |

| Parameters                                                                               | Units                                                              | Priors for fitting                                                                      |                       | Statistics of fitted parameters |                                                | Typical fitted parameters    |                                  |
|------------------------------------------------------------------------------------------|--------------------------------------------------------------------|-----------------------------------------------------------------------------------------|-----------------------|---------------------------------|------------------------------------------------|------------------------------|----------------------------------|
|                                                                                          |                                                                    | Minimum value                                                                           | Maximum value         | Median                          | 25 <sup>th</sup> – 75 <sup>th</sup> percentile | Using all data for fitting   | Without using dual predator data |
| Bacteriophage halo affinity for prey ( $K_{N,V}$ )                                       | prey cells ml <sup>-1</sup>                                        | 1.3x10 <sup>5</sup>                                                                     | 1.3x10 <sup>10</sup>  | 1.0x10 <sup>8</sup>             | 4.2x10 <sup>8</sup><br>5.0x10 <sup>8</sup>     |                              |                                  |
| Infected cell lysis rate ( $k_V$ )                                                       | bacteriophage virions infected cells <sup>-1</sup> h <sup>-1</sup> | 1.0x10 <sup>0</sup>                                                                     | 5.0x10 <sup>2</sup>   | 12                              | 8.1<br>18                                      | 4.2                          | 8.7                              |
| Bacteriophage halo burst size ( $Y_{V/I}$ )                                              | bacteriophage virions infected cells <sup>-1</sup>                 | 5.0x10 <sup>0</sup>                                                                     | 2.0x10 <sup>2</sup>   | 23                              | 20<br>27                                       | 24                           | 34                               |
| Nutrients released on <i>B. bacteriovorus</i> lysis ( $Y_{M/P}$ )                        | pg nutrients <i>B. bacteriovorus</i> cell <sup>-1</sup>            | 2.0x10 <sup>-5</sup>                                                                    | 2.0x10 <sup>-1</sup>  | 1.2x10 <sup>-3</sup>            | 2.7x10 <sup>-4</sup><br>5.5x10 <sup>-3</sup>   | 3.3x10 <sup>-3</sup>         | 2.8x10 <sup>-3</sup>             |
| Nutrients released on phage lysis ( $Y_{M/V}$ )                                          | pg nutrients bacteriophage virion <sup>-1</sup>                    | 1.0x10 <sup>-4</sup>                                                                    | 3.2x10 <sup>-1</sup>  | 1.7x10 <sup>-2</sup>            | 8.8x10 <sup>-3</sup><br>3.8x10 <sup>-2</sup>   | 2.1x10 <sup>-2</sup>         | 6.9x10 <sup>-3</sup>             |
| Rate of developing <i>B. bacteriovorus</i> plastic resistance – without signal ( $k_D$ ) | h <sup>-1</sup>                                                    | 5.0x10 <sup>-8</sup>                                                                    | 5.0x10 <sup>-4</sup>  | 5.0x10 <sup>-5</sup>            | 2.0x10 <sup>-5</sup><br>1.1x10 <sup>-4</sup>   | Parameter not in final model |                                  |
| Rate of developing <i>B. bacteriovorus</i> plastic resistance – with signal ( $k_D$ )    | prey cells <sup>-1</sup> h <sup>-1</sup>                           | 5.0x10 <sup>-14</sup>                                                                   | 5.0x10 <sup>-10</sup> | 1.7x10 <sup>-12</sup>           | 9.4x10 <sup>-13</sup><br>2.9x10 <sup>-12</sup> | 4.0x10 <sup>-12</sup>        | 1.3x10 <sup>-12</sup>            |
| Rate of reversion to sensitive prey ( $k_R$ )                                            | h <sup>-1</sup>                                                    | 5.0x10 <sup>-7</sup>                                                                    | 5.0x10 <sup>-3</sup>  | 2.9x10 <sup>-5</sup>            | 6.4x10 <sup>-5</sup><br>1.7x10 <sup>-4</sup>   | Parameter not in final model |                                  |
| Rate of <i>de novo</i> phage resistance mutations ( $k_M$ )                              | h <sup>-1</sup>                                                    | 1x10 <sup>-10</sup>                                                                     | 1x10 <sup>-8</sup>    | 7.0x10 <sup>-10</sup>           | 3.5x10 <sup>-10</sup><br>1.6x10 <sup>-9</sup>  | 7.5 x 10 <sup>-10</sup>      | 4.9x10 <sup>-9</sup>             |
| Predator mortality rate ( $m$ )                                                          | h <sup>-1</sup>                                                    | 0.04                                                                                    | 0.15                  | 6.1x10 <sup>-2</sup>            | 5.2x10 <sup>-2</sup><br>7.2x10 <sup>-2</sup>   | 6.4x10 <sup>-2</sup>         | 9.5x10 <sup>-2</sup>             |
| <i>B. bacteriovorus</i> burst size ( $Y_{P/B}$ )                                         | <i>B. bacteriovorus</i> cells bdelloplast <sup>-1</sup>            | Fixed to literature value of 4.17 from Fenton et al. (2010), reference 22 in main paper |                       |                                 |                                                |                              |                                  |

331

332

333 A  
334

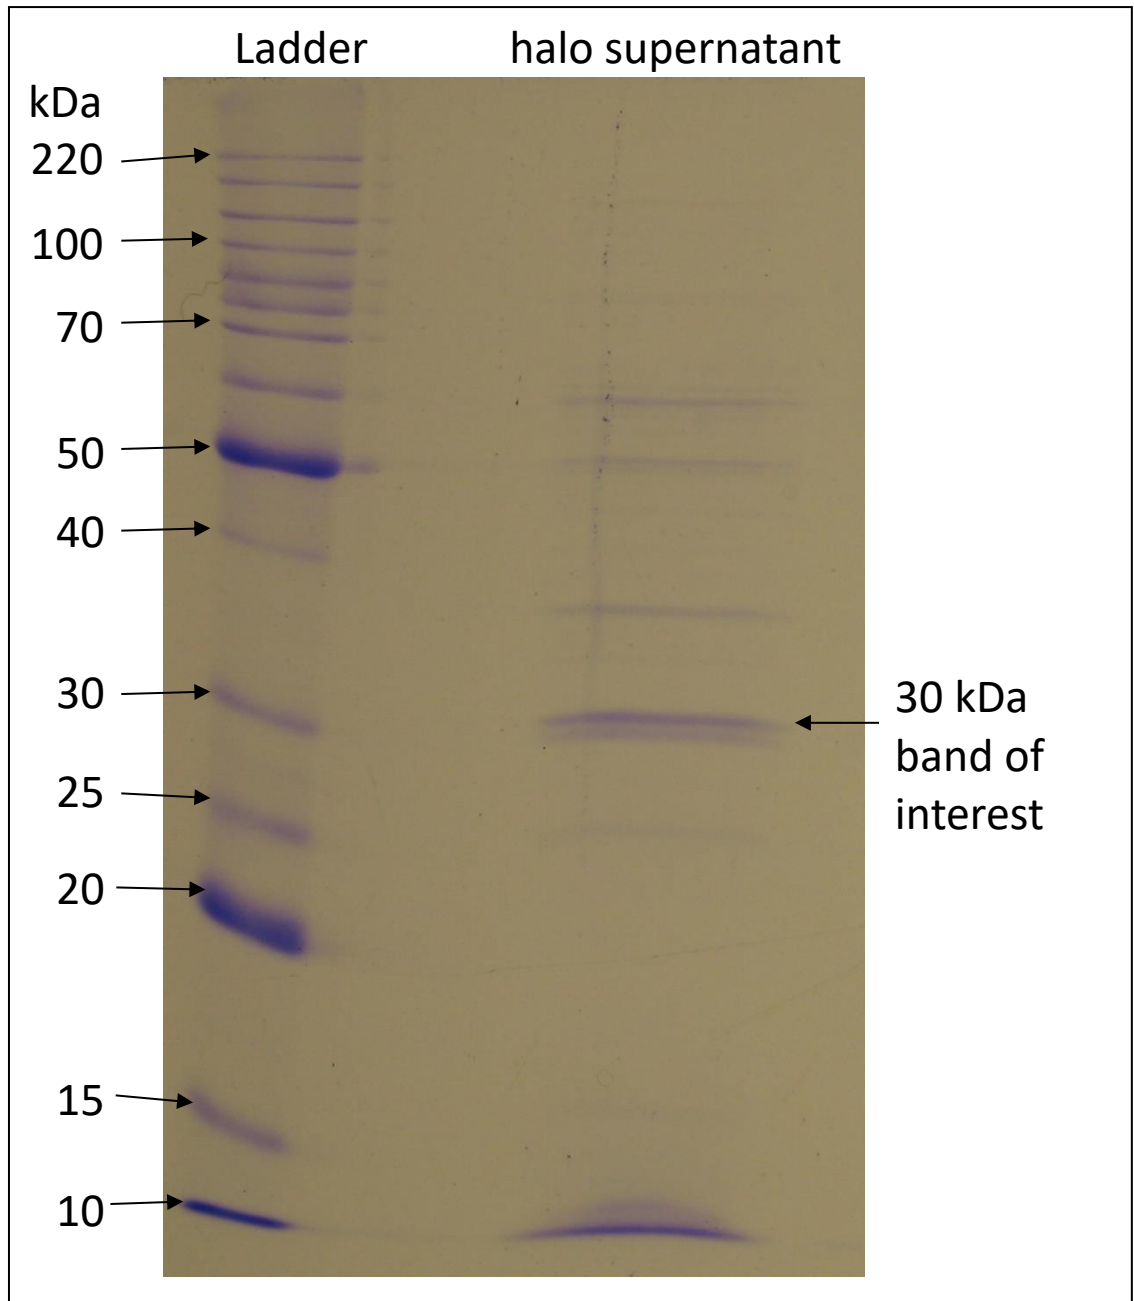

B

```

1  MAIKFDAAEQA KITHLEQMG VEKADAAGIW AVSQLTAALN RAYEKEYAEN
51  SVVNIFFPVTN EIPGHAKYFE YPEFDGVGIA QIIADYSDDL PLVDAFMTEK
101 QGKVFRRFGNA FLISTDEIKA GAATGQSLSA RKQALAFEAH DNLLDKLVWS
151 GSAPHGIVSV FDQPNINNVV ATPNWSVPQN AIDDDVTAMID AVESSTQGLH
201 HVTDILLPAS ARRVMQGLVP QTNLSYGELF TRNNPGLTIR FLQFLDNYDG
251 AGGKAALAFE KSPLNMSIEI PEVTNVLPAQ PKDLHFRYPV TSKATGLIVY
301 RPLTMAVIK  ITFA

```

**Fig. S1. Isolation and peptide analysis of a bacteriophage halo protein from the 0.22 $\mu$ m filtrate. (A)** SDS-page analysis of the purified bacteriophage halo showing multiple protein bands. The highlighted ~30 kDa band was extracted and analysed by MALDI QToF MS, showing homology to protein RTP27 of the rosette-tailed bacteriophage RTP. **(B)** Five peptides (bold) found by MALDI QToF MS analysis of the 30 kDa protein from panel (A) with homology to the 34 kDa protein RTP27 (GenBank accession no: CAJ42231.1, EMBL Accession Number AM156909.1) of a rosette-tailed phage (RTP) of *E. coli* (32).

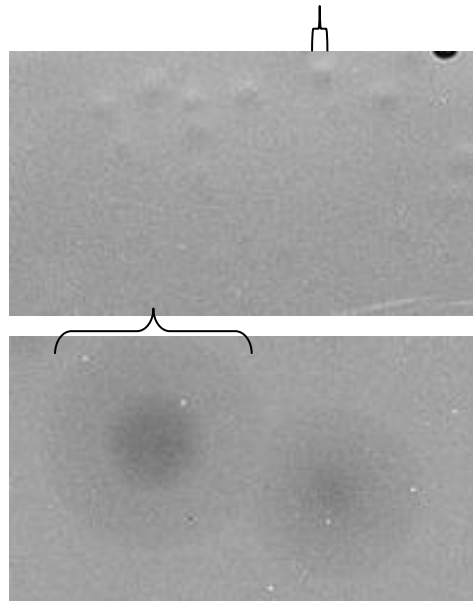

**Fig. S2. Plaque morphology from *E. coli* lawns on agar overlay plates of (A) purified *B. bacteriovorus* angelus alone after 6 days incubation and (B) when co-cultured with bacteriophage halo after 1 day of incubation, showing differences in plaque dimensions (bracketed on plate images taken at identical magnification), morphology and speed of plaque formation.**

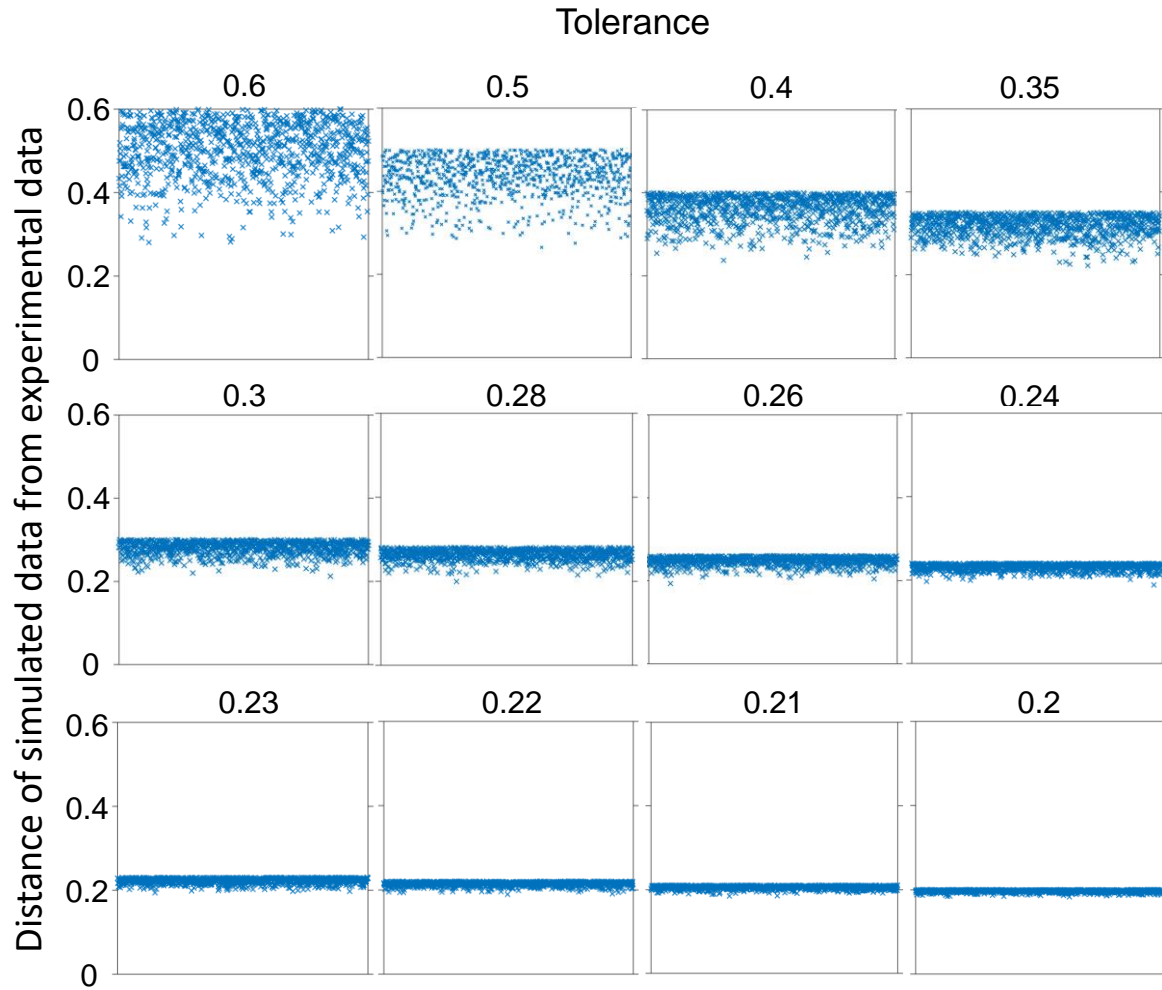

**Fig. S3. The fit of the final model improves from generation to generation in the ABC-SMC method.** In each generation, the threshold or tolerance for accepting a fit (numbers on top of the panels) was lowered. In the final generation, all accepted fits have a similar distance between simulated and experimental data, showing that fits with further reduced distance did not occur. None of the accepted fits in the first generation would have been accepted in the last generation. The x axis has no meaning and is simply used to spread out the data. See Supplemental Text for the distance measure.

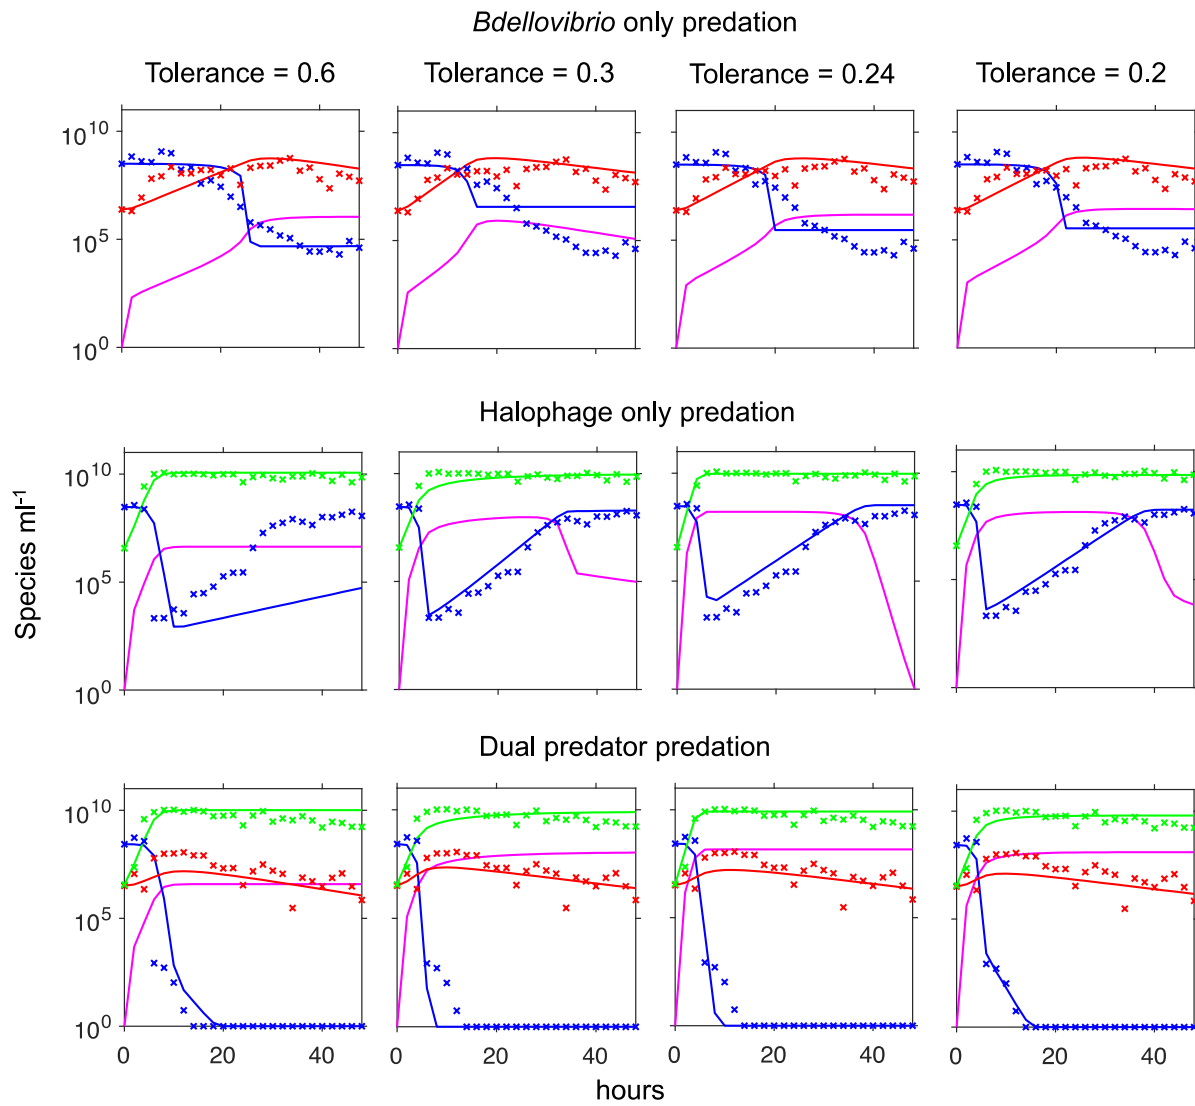

**Fig. S4. Model fit improves during ABC-SMC iterations.** The fit of the final model to all data improves over the generations, showing a subset of the generations in Fig. S3.



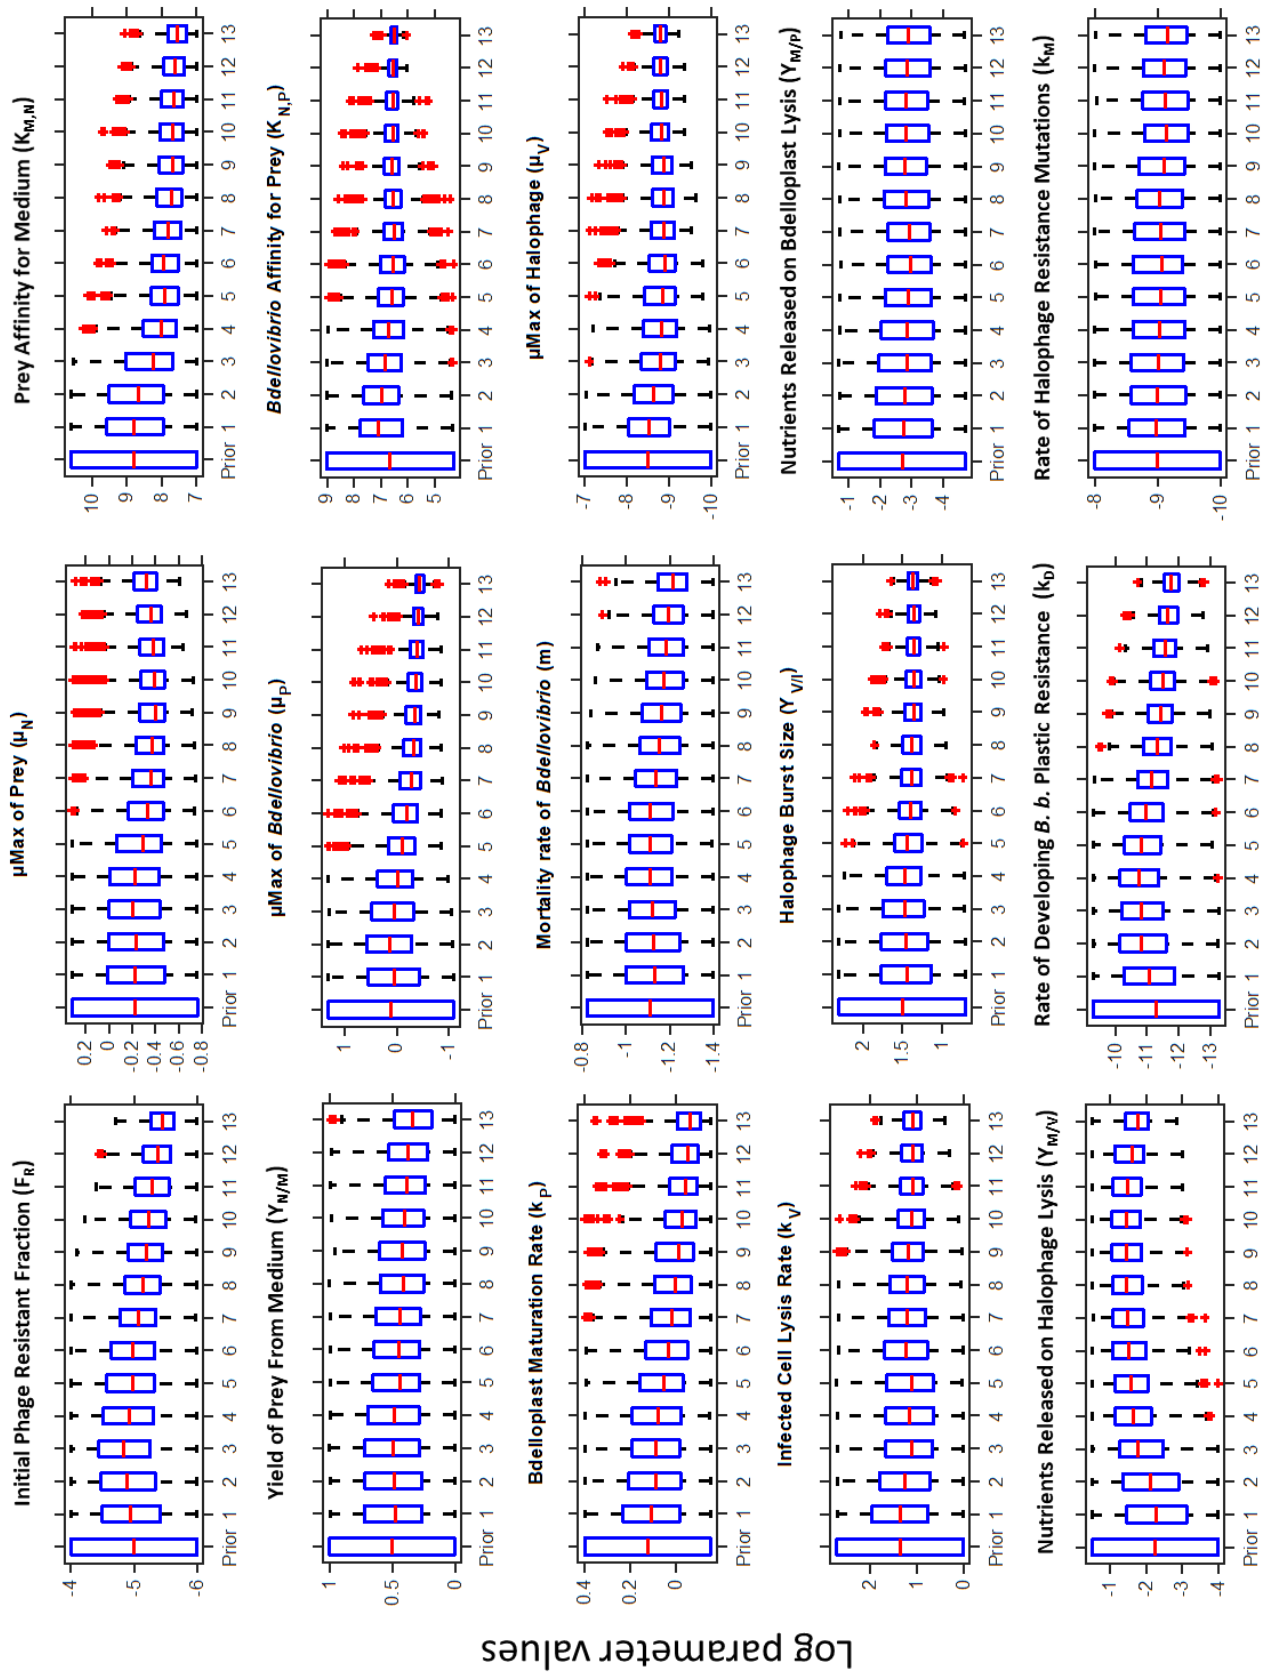

338 **Fig. S5. Convergence of fitted parameters from generation to generation**, starting from the uniform priors to the values after the final generation 12. Parameters that are better informed by the experimental data reach a more narrow spread of fitted values. Medians and quartiles from the final generation are shown in Supplementary Table S1. Note the log scale for the parameters.

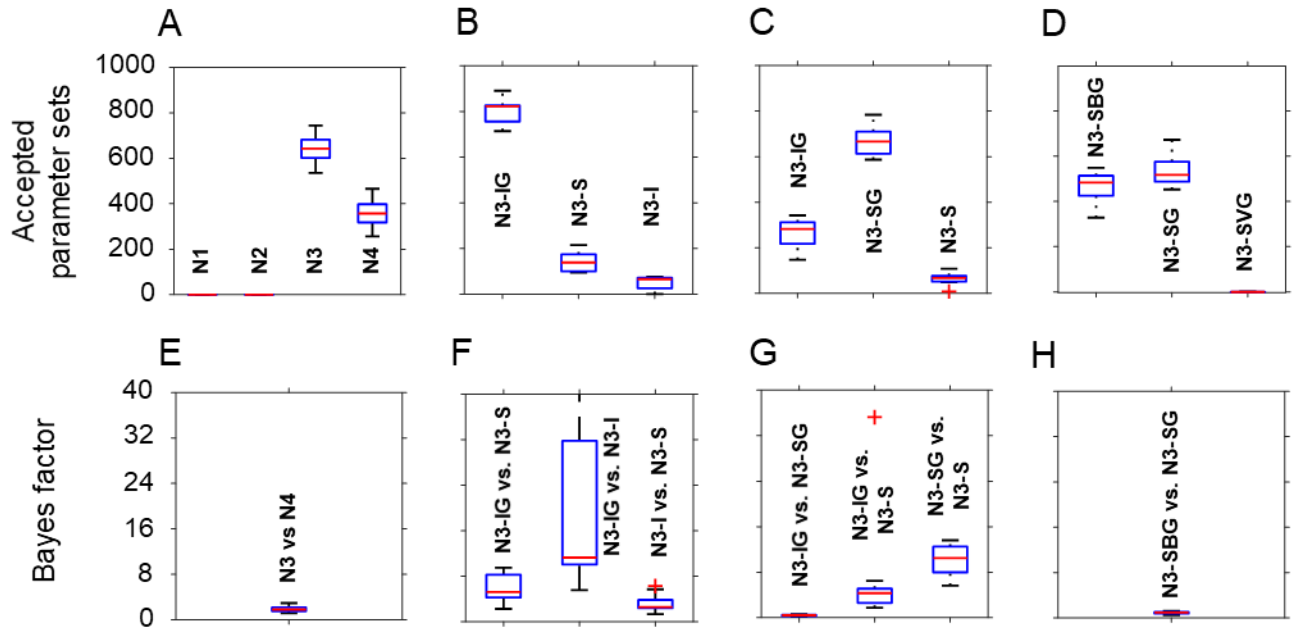

339

**Fig. S6. Box plots showing the variation amongst the 10 repeats of model selection.** We repeated the model selection procedure shown in Fig. 4A-D ten times because finding 1,000 acceptable parameter sets with a Monte Carlo method could lead to some variation between runs of the ABC-SMC algorithm and it is good to check whether these differences are large. We only show repeats for sub-model selections where the outcome was not 100% in favour of one model variant. The Bayes factor is the ratio of the times model X was accepted versus model Y.

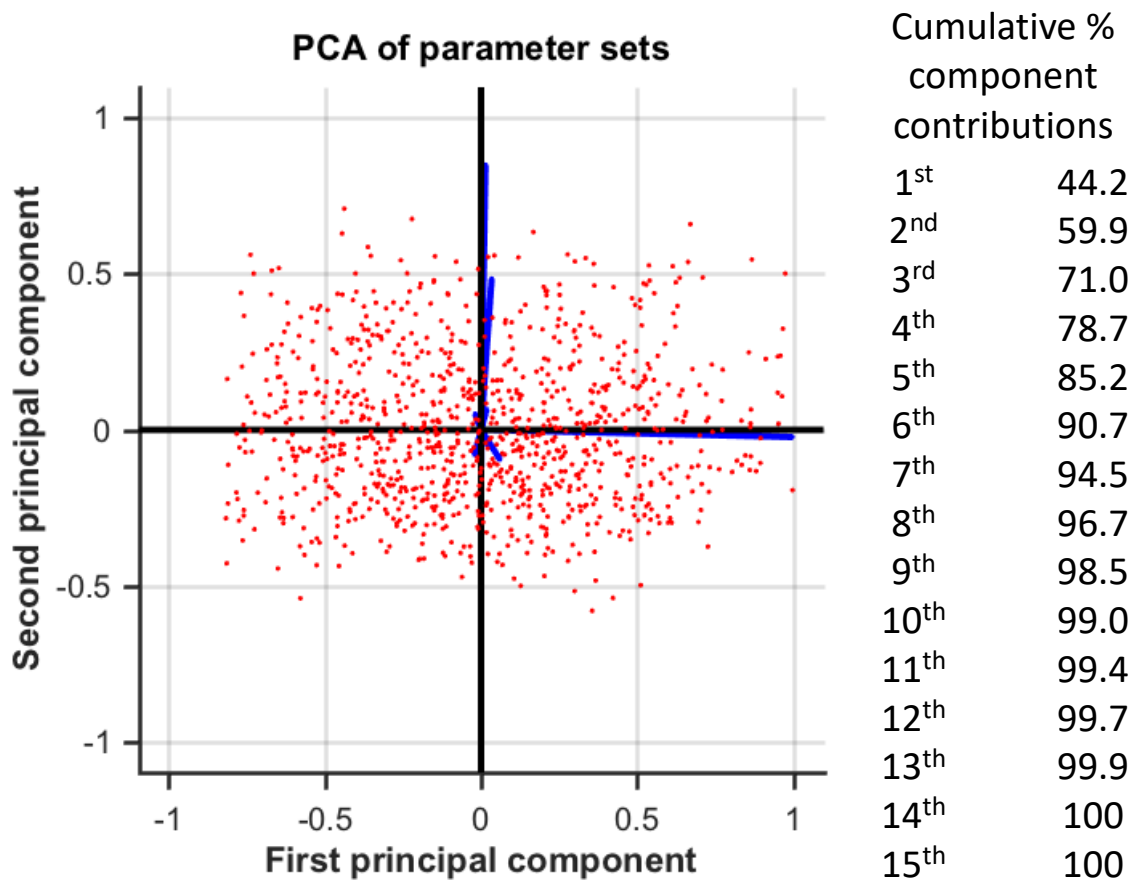

**Fig. S7. Objective selection of a typical parameter set.** Selection was from the hundreds of parameter sets that gave acceptable fits and were nearly equally good (see Fig. S3). Principal Component Analysis (PCA) was used to find the centre of the cloud of parameter sets in 15 dimensional parameter space. Four parameter sets that were closest to the centre were picked and used to run simulations. Results of these 4 simulations were indistinguishable by eye and one of these 4 parameter sets was then chosen as ‘typical’ and used in Fig. 5 and reported in Table S1.

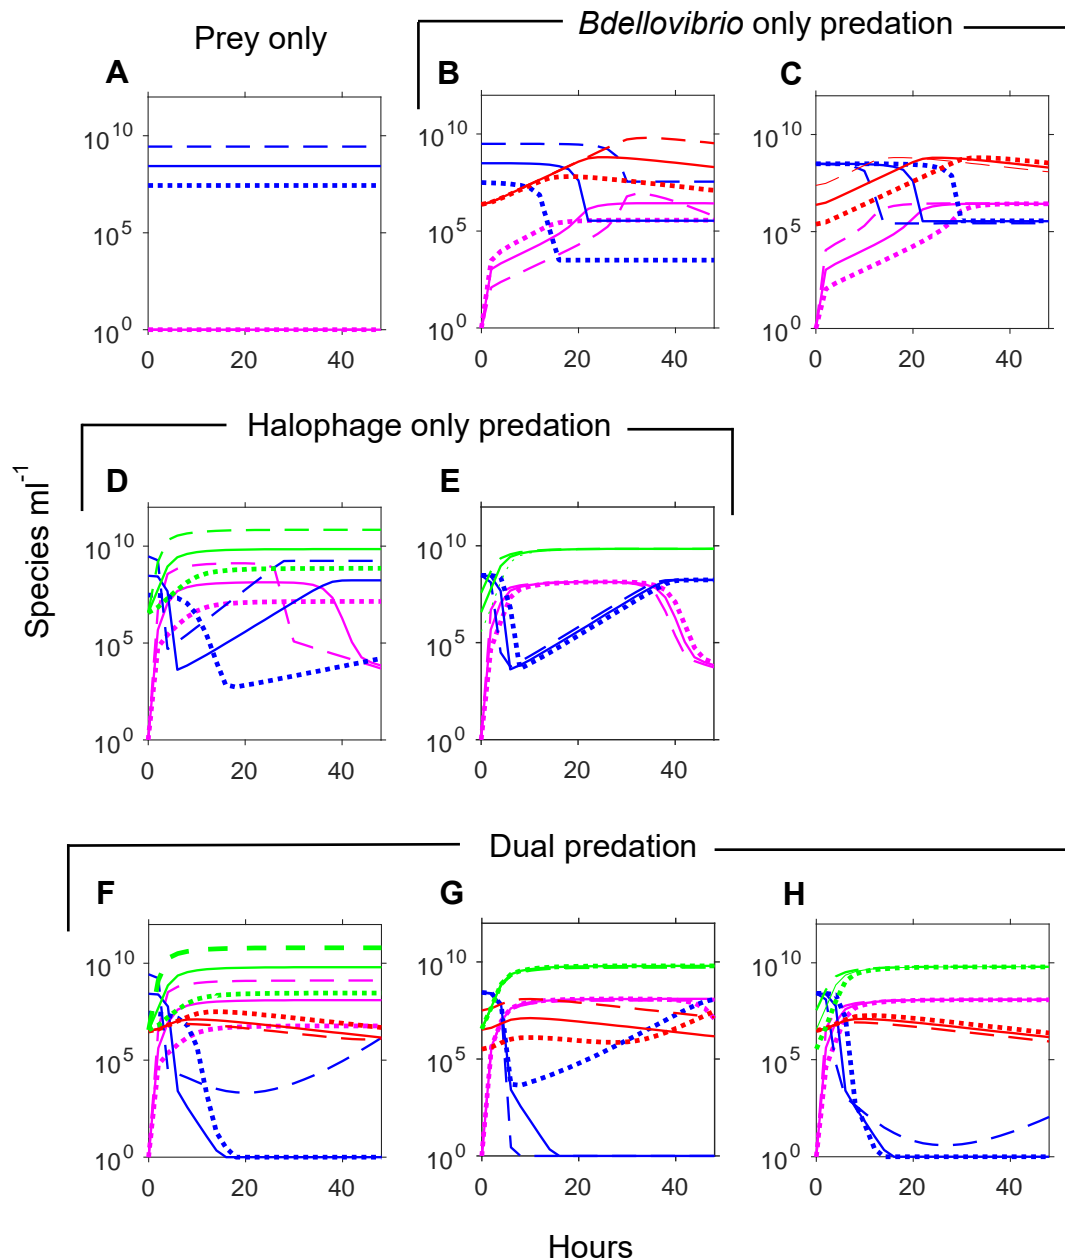

**Fig. S8. Effect of varying initial densities.** The model was simulated using the typical parameter values fitted to all data in Table S1, with either initial values from the experimental data (solid lines), one order of magnitude higher than these values (dashed lines) or one order of magnitude lower (dotted lines). Blue: *E. coli* prey, Red: *B. bacteriovorus*, Green: bacteriophage halo, Pink: medium. (A) Effects of initial prey density on prey only scenario. (B-C) Effects of varying either initial prey (B) or initial *Bdellovibrio* (C) densities on *Bdellovibrio* only predation. (D-E) Effects of varying either initial prey (D) or initial halophage (E) densities on halophage only predation. (F-H) Effects of varying either initial prey (F), initial *Bdellovibrio* (G) or initial halophage (H) densities on dual predation.
